# Supplementary material for: Chemostat culture systems support diverse bacteriophage communities from human feces
Source: PubMed Central journal article supplement (PMC4638026; doi:10.1186/s40168-015-0124-3), 2015-11-09
Supplement: 40168_2015_124_MOESM1_ESM.pdf [file 40168_2015_124_MOESM1_ESM.pdf]

**Table S1: Chemostat and fecal virome reads**

| <b>Sample</b> | <b>Initial Reads</b> | <b>Mean Length</b> | <b>16S</b> | <b>Human</b> | <b>Final Reads</b> | <b>Contigs</b> | <b>GC Content</b> | <b>Mean Length</b> |
|---------------|----------------------|--------------------|------------|--------------|--------------------|----------------|-------------------|--------------------|
| Donor 1       |                      |                    |            |              |                    |                |                   |                    |
| Day 4         | 507,611              | 200                | 0          | 1,381        | 506,230            | 5,457          | 45.5              | 947                |
| Day 8         | 767,240              | 208                | 0          | 405          | 766,835            | 3,280          | 44.8              | 948                |
| Day 12        | 504,907              | 205                | 0          | 475          | 504,432            | 3,926          | 43.7              | 1,033              |
| Day 16        | 732,018              | 204                | 0          | 484          | 731,534            | 4,064          | 43.9              | 997                |
| Day 24        | 895,131              | 215                | 0          | 466          | 894,665            | 3,383          | 46.6              | 939                |
| Feces         | 334,278              | 221                | 0          | 6            | 334,272            | 1,879          | 40.7              | 829                |
| Donor 2       |                      |                    |            |              |                    |                |                   |                    |
| Day 4         | 486,907              | 201                | 0          | 287          | 486,620            | 1,946          | 48.9              | 686                |
| Day 8         | 650,442              | 208                | 0          | 707          | 649,735            | 4,206          | 48.4              | 790                |
| Day 12        | 585,238              | 204                | 0          | 395          | 584,843            | 3,201          | 46.1              | 773                |
| Day 16        | 724,678              | 199                | 0          | 2,537        | 722,141            | 5,698          | 46.0              | 1,025              |
| Day 24        | 808,277              | 223                | 0          | 1,092        | 807,185            | 6,022          | 50.8              | 998                |
| Feces         | 615,197              | 227                | 0          | 1,503        | 613,694            | 3,739          | 42.5              | 1,014              |
| Donor 8       |                      |                    |            |              |                    |                |                   |                    |
| Day 3         | 533,819              | 222                | 0          | 977          | 532,842            | 6,541          | 47.7              | 846                |
| Day 6         | 476,648              | 224                | 0          | 468          | 476,180            | 4,547          | 46.0              | 821                |
| Day 12        | 659,253              | 221                | 0          | 980          | 658,273            | 5,781          | 47.0              | 890                |
| Day 18        | 645,691              | 213                | 0          | 100          | 645,591            | 1,114          | 46.6              | 876                |
| Day 24        | 690,421              | 224                | 0          | 58           | 690,363            | 1,018          | 46.3              | 815                |
| Feces         | 686,334              | 218                | 0          | 808          | 685,526            | 1,266          | 44.3              | 1,103              |
| Donor 9       |                      |                    |            |              |                    |                |                   |                    |
| Day 3         | 651,601              | 200                | 0          | 133          | 651,468            | 3,391          | 42.8              | 827                |
| Day 6         | 662,865              | 212                | 0          | 164          | 662,701            | 2,425          | 41.2              | 829                |
| Day 12        | 558,946              | 222                | 0          | 440          | 558,506            | 3,556          | 42.4              | 901                |
| Day 18        | 509,012              | 215                | 0          | 700          | 508,312            | 2,867          | 43.6              | 909                |
| Day 24        | 643,136              | 222                | 0          | 44           | 643,092            | 2,913          | 43.5              | 649                |
| Feces         | 463,689              | 224                | 0          | 80           | 463,689            | 2,696          | 40.0              | 924                |
| Donor 10      |                      |                    |            |              |                    |                |                   |                    |
| Day 4         | 622,317              | 211                | 0          | 3,909        | 618,408            | 4,533          | 51.0              | 1,219              |
| Day 8         | 713,608              | 220                | 0          | 1,243        | 712,365            | 5,148          | 47.8              | 927                |
| Day 12        | 561,765              | 220                | 0          | 2,193        | 559,572            | 5,891          | 48.3              | 1,107              |
| Day 16        | 578,809              | 224                | 0          | 1,255        | 577,554            | 5,365          | 46.1              | 931                |
| Day 24        | 704,854              | 225                | 0          | 1,495        | 703,359            | 4,808          | 51.5              | 1,015              |
| Feces         | 634,880              | 227                | 0          | 263          | 634,617            | 3,364          | 41.1              | 956                |
