# Supplementary material for: Chemostat culture systems support diverse bacteriophage communities from human feces
Source: PubMed Central journal article supplement (PMC4638026; doi:10.1186/s40168-015-0124-3), 2015-11-09
Supplement: 40168_2015_124_MOESM2_ESM.pdf [file 40168_2015_124_MOESM2_ESM.pdf]

**Table S2: Metrics from different assembly methods**

|          |        | CLC Genomics Workbench |             |              |             | IDBA UD                         |             |             |            | Metavelvet |         |             |            |             |
|----------|--------|------------------------|-------------|--------------|-------------|---------------------------------|-------------|-------------|------------|------------|---------|-------------|------------|-------------|
|          |        | Contigs                | Mean Length | Max Length   | N50         | Percent In Contigs <sup>b</sup> | Contigs     | Mean Length | Max Length | N50        | Contigs | Mean Length | Max Length | N50         |
| Donor 1  | Day 4  | <b>5457</b>            | <b>947</b>  | <b>41739</b> | <b>1444</b> | 94.5                            | 7883        | 606         | 16701      | 1079       | 11990   | 332         | 5745       | 456         |
|          | Day 8  | <b>3280</b>            | <b>948</b>  | <b>60551</b> | <b>1374</b> | 97.4                            | 5624        | 506         | 20749      | 1036       | 29258   | 140         | 1859       | 229         |
|          | Day 12 | <b>3926</b>            | <b>1033</b> | <b>53146</b> | <b>1665</b> | 95                              | 5199        | 686         | 28300      | 1340       | 10364   | 308         | 5535       | 1020        |
|          | Day 16 | <b>4064</b>            | <b>997</b>  | <b>57967</b> | <b>1633</b> | 96.6                            | 6433        | 578         | 18548      | 1196       | 10278   | 299         | 6743       | 664         |
|          | Day 24 | <b>3383</b>            | <b>939</b>  | <b>63171</b> | 1691        | 96.9                            | 5633        | 551         | 20249      | 1271       | 9596    | 279         | 6459       | <b>2414</b> |
|          | Stool  | <b>1879</b>            | <b>829</b>  | <b>29621</b> | <b>1069</b> | 96.1                            | 2830        | 418         | 17331      | 809        | 14503   | 141         | 2773       | 191         |
| Donor 2  | Day 4  | <b>1946</b>            | <b>686</b>  | <b>38124</b> | <b>709</b>  | 96.8                            | 3246        | 345         | 18417      | 574        | 13622   | 148         | 1388       | 181         |
|          | Day 8  | <b>4206</b>            | <b>790</b>  | <b>25757</b> | <b>963</b>  | 96.6                            | 6925        | 424         | 16493      | 746        | 6470    | 361         | 6457       | 562         |
|          | Day 12 | <b>3201</b>            | <b>773</b>  | <b>33183</b> | <b>895</b>  | 95.5                            | 5912        | 380         | 12411      | 687        | 20112   | 160         | 1729       | 227         |
|          | Day 16 | <b>5698</b>            | <b>1025</b> | <b>53789</b> | <b>1667</b> | 97                              | 9203        | 611         | 19208      | 1216       | 12318   | 386         | 6255       | 706         |
|          | Day 24 | <b>6022</b>            | <b>998</b>  | <b>51019</b> | <b>1662</b> | 96.2                            | 9030        | 599         | 15057      | 1132       | 15011   | 334         | 6067       | 98          |
|          | Stool  | <b>3739</b>            | <b>1014</b> | <b>52910</b> | <b>1826</b> | 92.4                            | 4188        | 661         | 27868      | 1503       | 10381   | 295         | 6174       | 1632        |
| Donor 8  | Day 3  | <b>6541</b>            | <b>846</b>  | <b>49980</b> | <b>1067</b> | 95.3                            | 6723        | 544         | 15285      | 869        | 11236   | 335         | 4993       | 321         |
|          | Day 6  | 4547                   | <b>821</b>  | <b>43340</b> | <b>975</b>  | 95.3                            | <b>3693</b> | 533         | 18075      | 836        | 29526   | 155         | 1916       | 183         |
|          | Day 12 | <b>5781</b>            | <b>890</b>  | <b>49984</b> | <b>1222</b> | 95                              | 6096        | 588         | 16130      | 982        | 10583   | 356         | 7480       | 506         |
|          | Day 18 | <b>1114</b>            | <b>876</b>  | <b>48541</b> | <b>1550</b> | 98.2                            | 3674        | 283         | 21185      | 568        | 14379   | 117         | 1615       | 171         |
|          | Day 24 | <b>1018</b>            | <b>815</b>  | <b>48504</b> | <b>1264</b> | 98.8                            | 3299        | 260         | 15020      | 423        | 10899   | 124         | 2275       | 326         |
|          | Stool  | <b>1266</b>            | <b>1102</b> | <b>19694</b> | <b>2226</b> | 96.6                            | 3576        | 415         | 14004      | 1138       | 17949   | 115         | 3478       | 114         |
| Donor 9  | Day 3  | <b>3391</b>            | <b>827</b>  | <b>69536</b> | <b>1074</b> | 97                              | 4732        | 530         | 21652      | 971        | 24712   | 149         | 1659       | 68          |
|          | Day 6  | <b>2425</b>            | <b>829</b>  | <b>45528</b> | <b>1083</b> | 98                              | 4271        | 415         | 34999      | 781        | 20256   | 138         | 1562       | 199         |
|          | Day 12 | <b>3556</b>            | <b>901</b>  | <b>94115</b> | <b>1179</b> | 97.1                            | 3749        | 495         | 13218      | 779        | 26927   | 150         | 1884       | 244         |
|          | Day 18 | <b>2867</b>            | <b>909</b>  | <b>93797</b> | <b>1272</b> | 97                              | 3672        | 501         | 13588      | 886        | 23077   | 148         | 2454       | 112         |
|          | Day 24 | <b>2913</b>            | <b>649</b>  | <b>93414</b> | <b>735</b>  | 96.5                            | 3332        | 361         | 9701       | 632        | 17927   | 148         | 2013       | 134         |
|          | Stool  | <b>2696</b>            | <b>924</b>  | <b>41934</b> | <b>1421</b> | 94.7                            | 3090        | 530         | 32413      | 1084       | 5600    | 337         | 7040       | 100         |
| Donor 10 | Day 4  | <b>4533</b>            | <b>1219</b> | <b>51727</b> | <b>2722</b> | 96                              | 8707        | 607         | 16925      | 1348       | 12931   | 366         | 6753       | 146         |
|          | Day 8  | <b>5148</b>            | <b>927</b>  | <b>40455</b> | <b>1241</b> | 97.1                            | 6454        | 500         | 17015      | 825        | 9956    | 358         | 6084       | 428         |
|          | Day 12 | <b>5891</b>            | <b>1107</b> | <b>48332</b> | 1858        | 96.1                            | 6643        | 625         | 29283      | 1058       | 14100   | 380         | 6188       | <b>2250</b> |
|          | Day 16 | <b>5365</b>            | <b>931</b>  | <b>40497</b> | <b>1262</b> | 96.2                            | 5674        | 548         | 14373      | 861        | 10566   | 351         | 7931       | 1140        |
|          | Day 24 | <b>4808</b>            | <b>1015</b> | <b>40172</b> | <b>1614</b> | 97.9                            | 7070        | 564         | 17794      | 1019       | 10720   | 390         | 9062       | 987         |
|          | Stool  | 3364                   | <b>956</b>  | <b>50410</b> | <b>1578</b> | 97.6                            | <b>3264</b> | 599         | 27849      | 1353       | 8530    | 281         | 9951       | 719         |

<sup>a</sup>The method with the least number of contigs, highest mean length, highest maximum length, and/or highest N50 values is represented in bold.

<sup>b</sup>Percentage of reads that were assembled into contigs
